# Supplementary material
Source: PubMed Central journal article supplement (PMC11107709)
Supplement: 18_2017_2459_MOESM9_ESM.pdf [file 18_2017_2459_MOESM9_ESM.pdf]

Figure S6

Upregulated gene

| Sequence       | Organism                      | Chromosome | #Genes | Length  | Gene Locations |
|----------------|-------------------------------|------------|--------|---------|----------------|
| TGME49_chrIX   | <i>Toxoplasma gondii</i> ME49 | IX         | 22     | 6327655 |                |
| TGME49_chrX    | <i>Toxoplasma gondii</i> ME49 | X          | 15     | 7486190 |                |
| TGME49_chrIV   | <i>Toxoplasma gondii</i> ME49 | IV         | 13     | 2686605 |                |
| TGME49_chrXII  | <i>Toxoplasma gondii</i> ME49 | XII        | 13     | 7094428 |                |
| TGME49_chrXI   | <i>Toxoplasma gondii</i> ME49 | XI         | 12     | 6623461 |                |
| TGME49_chrVI   | <i>Toxoplasma gondii</i> ME49 | VI         | 11     | 3656745 |                |
| TGME49_chrVIIb | <i>Toxoplasma gondii</i> ME49 | VIIb       | 10     | 5069724 |                |
| TGME49_chrVIII | <i>Toxoplasma gondii</i> ME49 | VIII       | 8      | 6970285 |                |
| TGME49_chrVIIa | <i>Toxoplasma gondii</i> ME49 | VIIa       | 8      | 4541629 |                |
| TGME49_chrII   | <i>Toxoplasma gondii</i> ME49 | II         | 7      | 2347032 |                |
| TGME49_chrV    | <i>Toxoplasma gondii</i> ME49 | V          | 6      | 3331915 |                |
| TGME49_chrla   | <i>Toxoplasma gondii</i> ME49 | la         | 5      | 1859933 |                |
| TGME49_chrlb   | <i>Toxoplasma gondii</i> ME49 | lb         | 5      | 1955354 |                |
| TGME49_chrIII  | <i>Toxoplasma gondii</i> ME49 | III        | 4      | 2532871 |                |

Downregulated gene

| Sequence          | Organism                      | Chromosome | #Genes | Length  | Gene Locations |
|-------------------|-------------------------------|------------|--------|---------|----------------|
| TGME49_chrV       | <i>Toxoplasma gondii</i> ME49 | V          | 5      | 3331915 |                |
| TGME49_chrIX      | <i>Toxoplasma gondii</i> ME49 | IX         | 4      | 6327655 |                |
| TGME49_chrXII     | <i>Toxoplasma gondii</i> ME49 | XII        | 4      | 7094428 |                |
| TGME49_chrla      | <i>Toxoplasma gondii</i> ME49 | la         | 3      | 1859933 |                |
| TGME49_chrVIIa    | <i>Toxoplasma gondii</i> ME49 | VIIa       | 2      | 4541629 |                |
| TGME49_chrVIIb    | <i>Toxoplasma gondii</i> ME49 | VIIb       | 2      | 5069724 |                |
| TGME49_chrXI      | <i>Toxoplasma gondii</i> ME49 | XI         | 2      | 6623461 |                |
| TGME49_chrVI      | <i>Toxoplasma gondii</i> ME49 | VI         | 1      | 3656745 |                |
| TGME49_chrX       | <i>Toxoplasma gondii</i> ME49 | X          | 1      | 7486190 |                |
| tgme49_asmb1.1936 | <i>Toxoplasma gondii</i> ME49 |            | 1      | 5175    |                |
| tgme49_asmb1.1944 | <i>Toxoplasma gondii</i> ME49 |            | 1      | 35372   |                |
