# Supplementary material
Source: PubMed Central journal article supplement (PMC11107709)
Supplement: 18_2017_2459_MOESM10_ESM.pdf [file 18_2017_2459_MOESM10_ESM.pdf]

Figure S7

TGGT1\_259640 (100%), 302,321.9 Da  
| organism=Toxoplasma\_gondii\_GT1 | product=nucleoporin autopeptidase | location=TGGT1\_chrVIIb:2709338-2721341(-) | length=2894 | sequence\_SO=chromosome | SO=protein\_coding  
32 unique peptides, 53 unique spectra, 89 total spectra, 498/2894 amino acids (17% coverage)

|                            |                            |                            |                            |                            |                            |                            |                            |
|----------------------------|----------------------------|----------------------------|----------------------------|----------------------------|----------------------------|----------------------------|----------------------------|
| M F S S N T S S S L        | T G G G S L F G S S        | G G G G G L F G G A        | G T Q Q Q Q G G S L        | F G G T G G F M S Q        | P Q Q Q T Q G R L F        | G N A G T T G M S L        | F G Q Q Q T T P Q          |
| S G G L F G S S T T        | T N S G L F G S A P        | Q Q Q T G G L F G S        | S G L S Q P Q Q T P        | S G G G L F G S T N        | T S T L G S S I T G        | G G L F G Q Q P Q Q        | T G G L F G S S T G        |
| T G T G A A A T G T        | G A L G Q Q Q S G S        | L F G S S G F G T N        | T G G F G T S T L G        | T A G Q Q T S G G L        | F G S Q P Q G G G L        | F G S N T S S F G A        | A G T S G T S A F G        |
| T S T F G G G A A T        | G S V L G A G S L Q        | Q Q Q P F Q P H K T        | E E G L L M S I C F        | G N L A E V S Q D E        | E R W R F Y Q Q R G        | G G A M G A S N T P        | G T G L F G Q Q T T        |
| Q Q P S G G L F G N        | S A G T T T S G G L        | F G S T P A S T T G        | T G L L G S T P Q T        | N Q Q Q S G G L F G        | T S T T G G F G G G        | L F G S S A T T Q P        | S G Q Q Q T G G L F        |
| G N T G G S T T P P        | G G G L F G S S T L        | G N T T G T G L F G        | S T T T P Q Q T Q S        | G G L F G Q Q Q Q T        | A G S G G L F G S S        | S L T G A T N T G G        | G L F G S S T P S          |
| T G L F G S T T Q Q        | C Q P G A T T T Q T        | G G G L F G S T T T        | S A T T T G Q A T T        | G T G L F G G L S S        | G T G A T Q G G G L        | F G S G G T A T T G        | A T G G G L F G N A        |
| Q Q Q S N L S G G G        | L F G S S G G L K L        | G T T T T P Q T T P        | G A T G T T G G L F        | G N T T T T G A S G        | G T S L F G S S L G        | T S G G G L F G S S        | A A K P G E T G G L        |
| F G S S G T S G T S        | G S L F G N T T T G        | A G T G T G L L G A        | A P A S S G T G T S        | G G G L F G S S T T        | G S G T G L F G G S        | G I F G S A Q T I Q        | Q O N S A A G G L F        |
| G S T S A G G V G V        | G G S T L G S G Q A        | N Q T S L F G A I G        | S L S G C G A Q G A        | P A S A A A A D A Y        | G L A S L L G G H V        | E V K L T L S A R P        | S E S S A Q E S A Q        |
| <b>I F P P R M Q L L D</b> | <b>P C G G T A L G D T</b> | <b>G L L G S V G S S V</b> | <b>W R S G A P A R L C</b> | <b>R G R R F R P L G P</b> | <b>M E G G L S G S Y L</b> | <b>S S G A S N A S F A</b> | <b>L P E V Y I Q K A F</b> |
| G T S R T A S P L E        | D E S K G G Q A N A        | L R L L P D G K A F        | S A A P W A S T T L        | E R S A V E A L L M        | Q R R R R K P G R L T      | P D Q V S P W S S T        | A L Q F M R S N P F        |
| Y R E Q L A E V Q A        | S K D T M E N K D R        | D T L P P T S Q S A        | P A A A G V K E T T        | L A S E E V S A P A        | S V S C P A V P G V        | L P A S A A V P D E        | K R G W T A N V E V        |
| <b>S P S A K K L A G L</b> | <b>G I S P I E T F S L</b> | <b>A T P A G S P G T S</b> | <b>P N G S R T G P A E</b> | E C T R W H G A P P        | A S G S V A A G L E        | S V A A C L P A P E        | D L R P V L T R P D        |
| Y E T V P S I E V L        | T G M T E Q K L S R        | V Q D F S I T R R G        | Y G S I R W P G Y T        | D L R G I N L D E A        | V K I E K L E V T V        | Y G N E A P P C G V        | G L N K R A V I T L        |
| K N C K P R S V K Y        | <b>L D T L T I Q R P E</b> | <b>D E A Y V Q D K Q C</b> | Q Y V T K V R R Y T        | E R M G A K F V D L        | N L A T G E W T F F        | V E H F S T Y R F L        | D E D D E N D E E L        |
| E T Q L R Q K A L L        | P S T S A H Q P T L        | E S P V K V L P A H        | A D S F P A S P E N        | R T R D F G E A P E        | R I T H L F P E R P        | A N G Y S S E R S S        | F L G V Q K Q V L K        |
| A G F A E A D R E T        | P A Y L G G G V A E        | N L V N P E F L K N        | V S L A E S V N R H        | C Q Q R W R P L Y V        | S G E A P S R G L K        | R V S Y N S G K T V        | E A V H D L K E K A        |
| L P G G E R W E A T        | G V S G G R M V W E        | P Q V N G V E A S H        | R G V Q R F Q D E K        | T E D K G V Q D T E        | R R D G G A A A S L        | R L E D G T G G S V        | R A V P P G R P C E        |
| D T R S S S A S F P        | H L Q Q R R H C P Y        | P V R C A P V I S R        | D G L M A L P L L S        | L P V S L E G I T T        | A S L P G S L V Q L        | A H L S P L L R E E        | E M P V Q N G G I S        |
| S S V G S L E G G S        | A G L E A P V Q P S        | P M W T V G E V P D        | E S V S R E E E E E        | K Q A L S M A A Q R        | Y V Q P L R E A K G        | <b>A P S L T A A S L P</b> | <b>L A D V S P A L V A</b> |
| <b>A S R L R P F Q A D</b> | <b>L A T S G A P Y T N</b> | <b>Q S P T E Q L S L V</b> | <b>R D G C R V R R T L</b> | <b>G A S A M P L V L S</b> | <b>A F L E E V V K E N</b> | G E S E L Q S R E E        | D S Q Q S E S S A R        |
| A D A T Q E F L P A        | L T P A P E V A E M        | G K E G R R G R R S        | K G E A G S S G D S        | N R R R F R S Q Q S        | E W W L L T E L C R        | Q E S H A L E K S R        | R S K S V K T L N A        |
| F P S S G L V Q R L        | L L R <b>L L A F F E Q</b> | <b>Q T R V Y S G C M S</b> | P T S S V S V G N S        | K C S L P L S S Q P        | F L Q S A P V S S A        | H P P D V P E A S Y        | L A P Y M L Q T W Q        |
| L L V A L M L S S P        | E Q E E S V F T A P        | S G L F S Q R D I S        | P E A I L E S Q R Q        | S R L L E W L L R E        | S G R E V T A L L Q        | R A A A L R A S P P        | F S T S E G L S L D        |
| R G E S L C G A T E        | L C R Q R G A A Q N        | P A I T R L G A N A        | L F R L A G T A G Q        | R A L Q I A M A A D        | H D E E R K L L A V        | F H L A A A G Q L Y        | D A V E L L L N S R        |
| P G E P Y Y P H L A        | L C L A A H V Q Q Q        | V G R E F L Y Y N L        | <b>F R A T A P S F L T</b> | P P P G I A R L Y R        | L L T P C S T R A S        | P S P G S A S V K A        | K E G E K R K R S I        |
| S P G V V E P A E A        | S R C A S P S K R H        | A G A T D R N S G A        | K H E S T H A L S L        | H A S W K S G E T T        | E A N S V S G M G L        | E H F V S W R H Q L        | T A S L V F S S A S        |
| P L E D P R <b>V L S T</b> | <b>G A V V S S G G N A</b> | <b>E K K V D S V D E G</b> | E K A A A C T Q E D        | T V T Q T K G E G S        | A A D V D M F O R I        | <b>R T E L T P P P Q A</b> | <b>A D A P R E L R R A</b> |
| L L Q F E H R L R F        | R E N G D A S Q S G        | V E F A V P A S P A        | P L Y R Q Q D E D G        | E T Q K D R <b>M H D G</b> | <b>L Q G A T S N I F D</b> | <b>L Q Y G L L R M H A</b> | G L A Q P S L S I F        |
| D P S S H T P Y G L        | D F F F A W T A G V        | V T L L H R G S A R        | A R V R L L K Q T E        | S E G T E A A E A I        | D A E D G L E Q E E        | A R Q L H R L T V A        | F A A E L E C L P G        |
| C W P W A C A A L L        | F T P F C G R A L Q        | G M R A L I G R H A        | A E F T C T G V G P        | R Q S G K E S Q G L        | Q A F P E K A A F E        | E R R R E I L R V L        | L E E V G V A Q W W        |
| L D E A D G L Y A L        | S Q R K F M Q A A F        | L F Y W A Y L R L R        | L P L V R <b>G F L G S</b> | <b>P V A A P L R E E L</b> | <b>L N L W S P T G A M</b> | <b>E R H L L R H A G R</b> | A L L Q C L P G F L        |
| L A V L L Q Q I Q H        | V E K E T R V S R M        | R R A L E K C E R L        | T G S V T S G T T R        | A L S D E L R A Y E        | R Q E R R E E P T E        | V C D E M G S M P S        | V L I L S T E A K M        |
| R <b>L L L Q I L E A I</b> | <b>R V K L A G G L P D</b> | L S Q D A N G T D G        | S R K G V E K D I L        | A S C V V G G E C R        | S A K F P V D L A R        | L A C M E K A L R W        | L L K K Q M R K Q K        |
| Q H N R T E Q R T S        | P G S A R V P S S D        | A K L S G A T A K S        | S L E E D G D R V D        | A D F S A A L L R E        | V E K Q T K H V E A        | M S D A N R G F F P        | T D I S P D E P A F        |
| W I A L K T A L L E        | E R R E                    |                            |                            |                            |                            |                            |                            |
