# Supplementary material
Source: PubMed Central journal article supplement (PMC11107709)

Figure S8

**Fold Type**

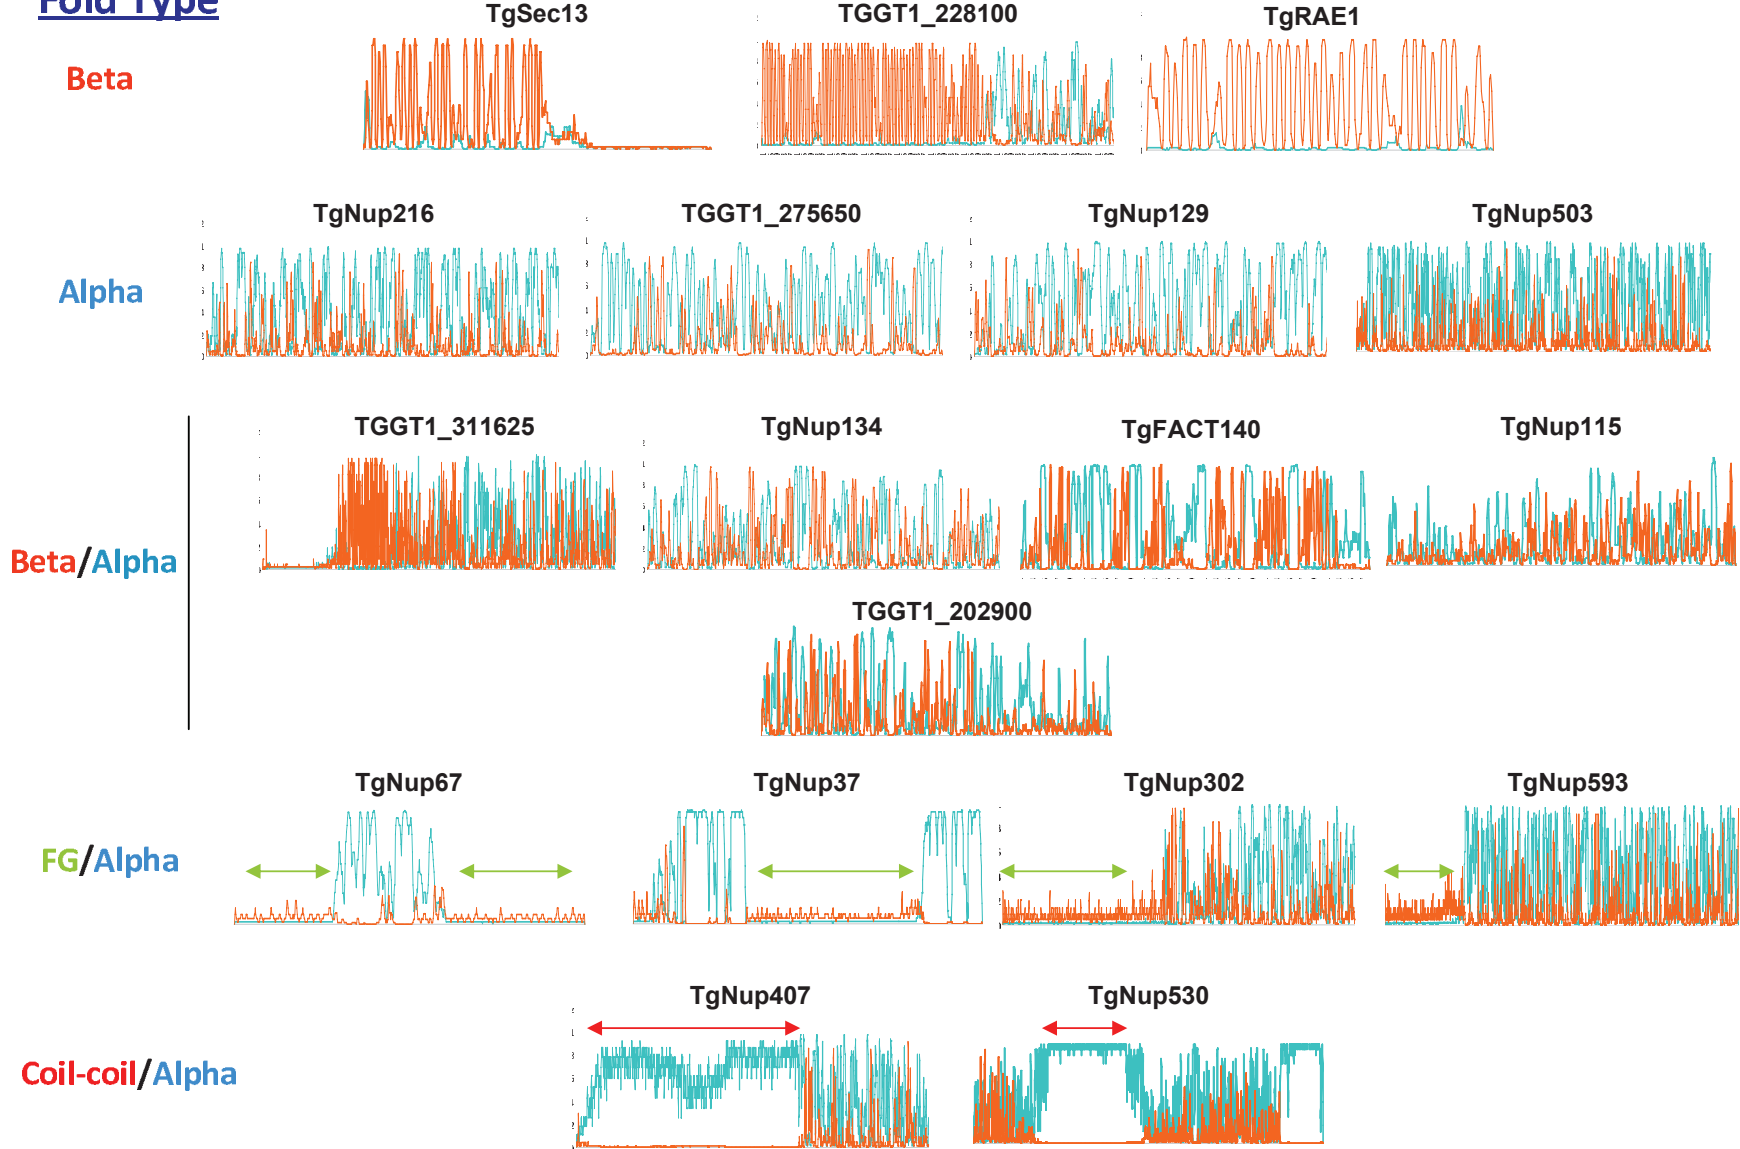

Supplement: 18_2017_2459_MOESM11_ESM.pdf [file 18_2017_2459_MOESM11_ESM.pdf]

Figure S9

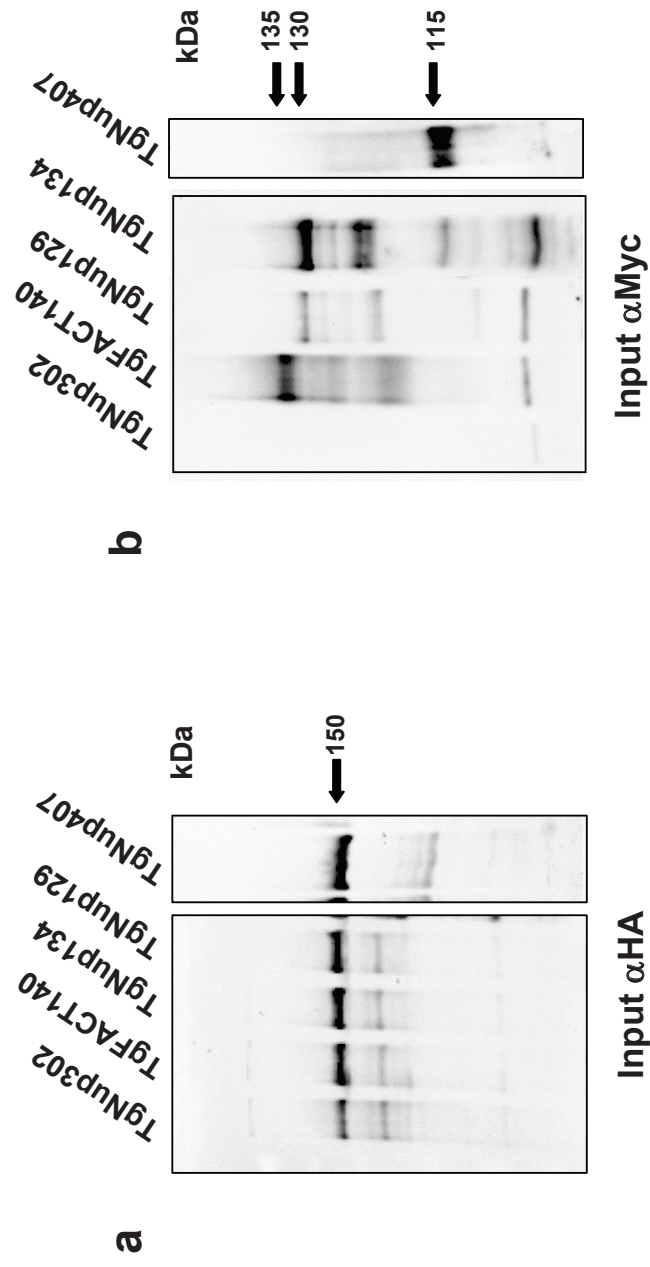

Supplement: 18_2017_2459_MOESM12_ESM.pdf [file 18_2017_2459_MOESM12_ESM.pdf]

Figure S10

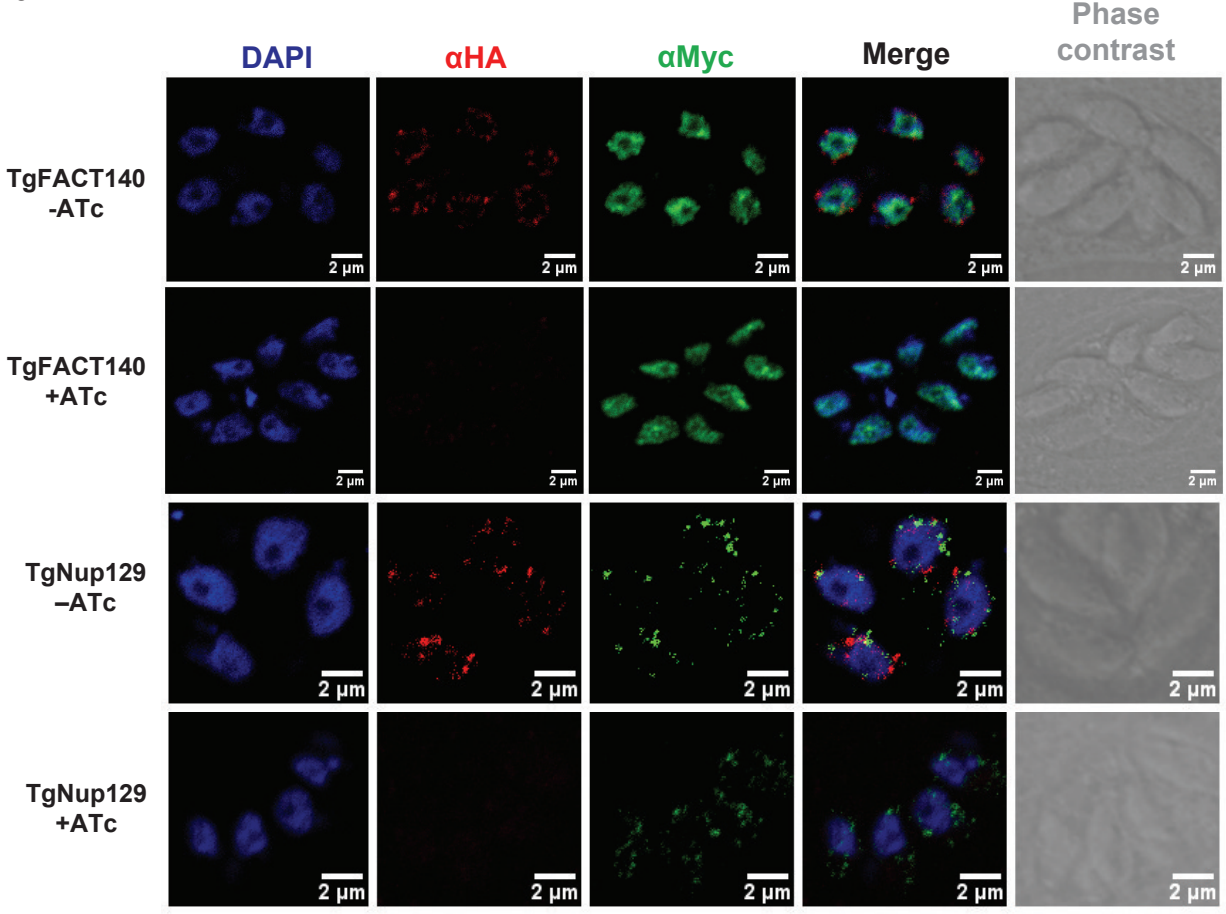

Supplement: 18_2017_2459_MOESM13_ESM.pdf [file 18_2017_2459_MOESM13_ESM.pdf]

Figure S11

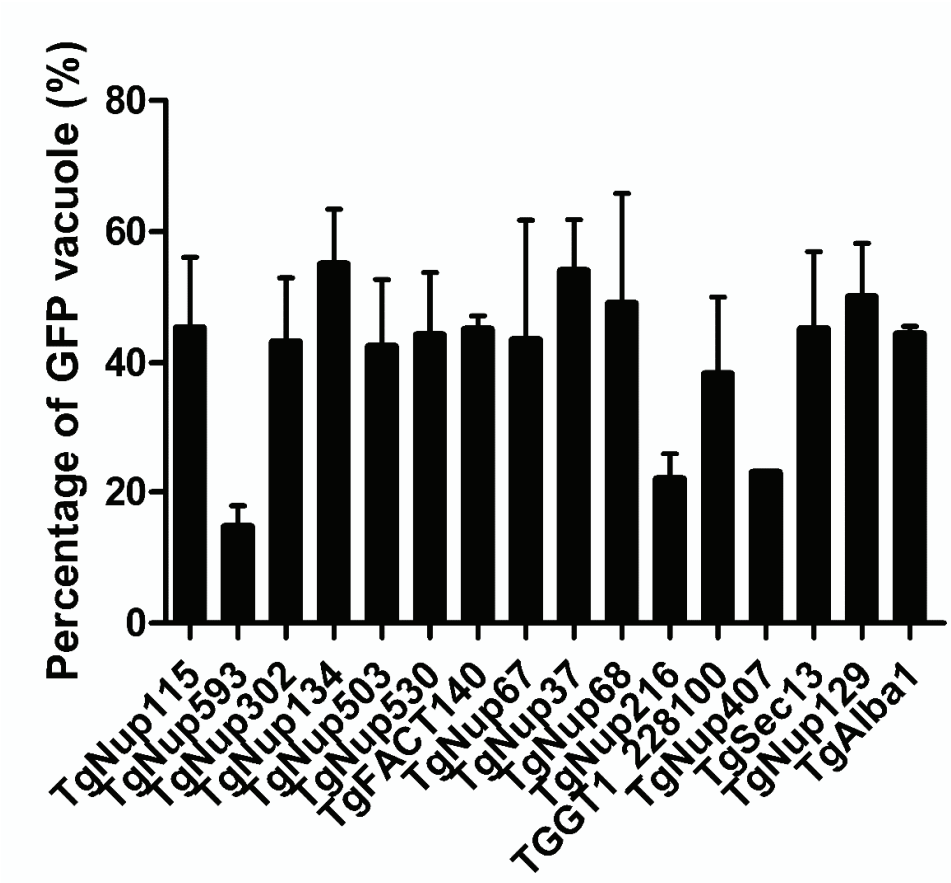

Supplement: 18_2017_2459_MOESM14_ESM.pdf [file 18_2017_2459_MOESM14_ESM.pdf]

Figure S1

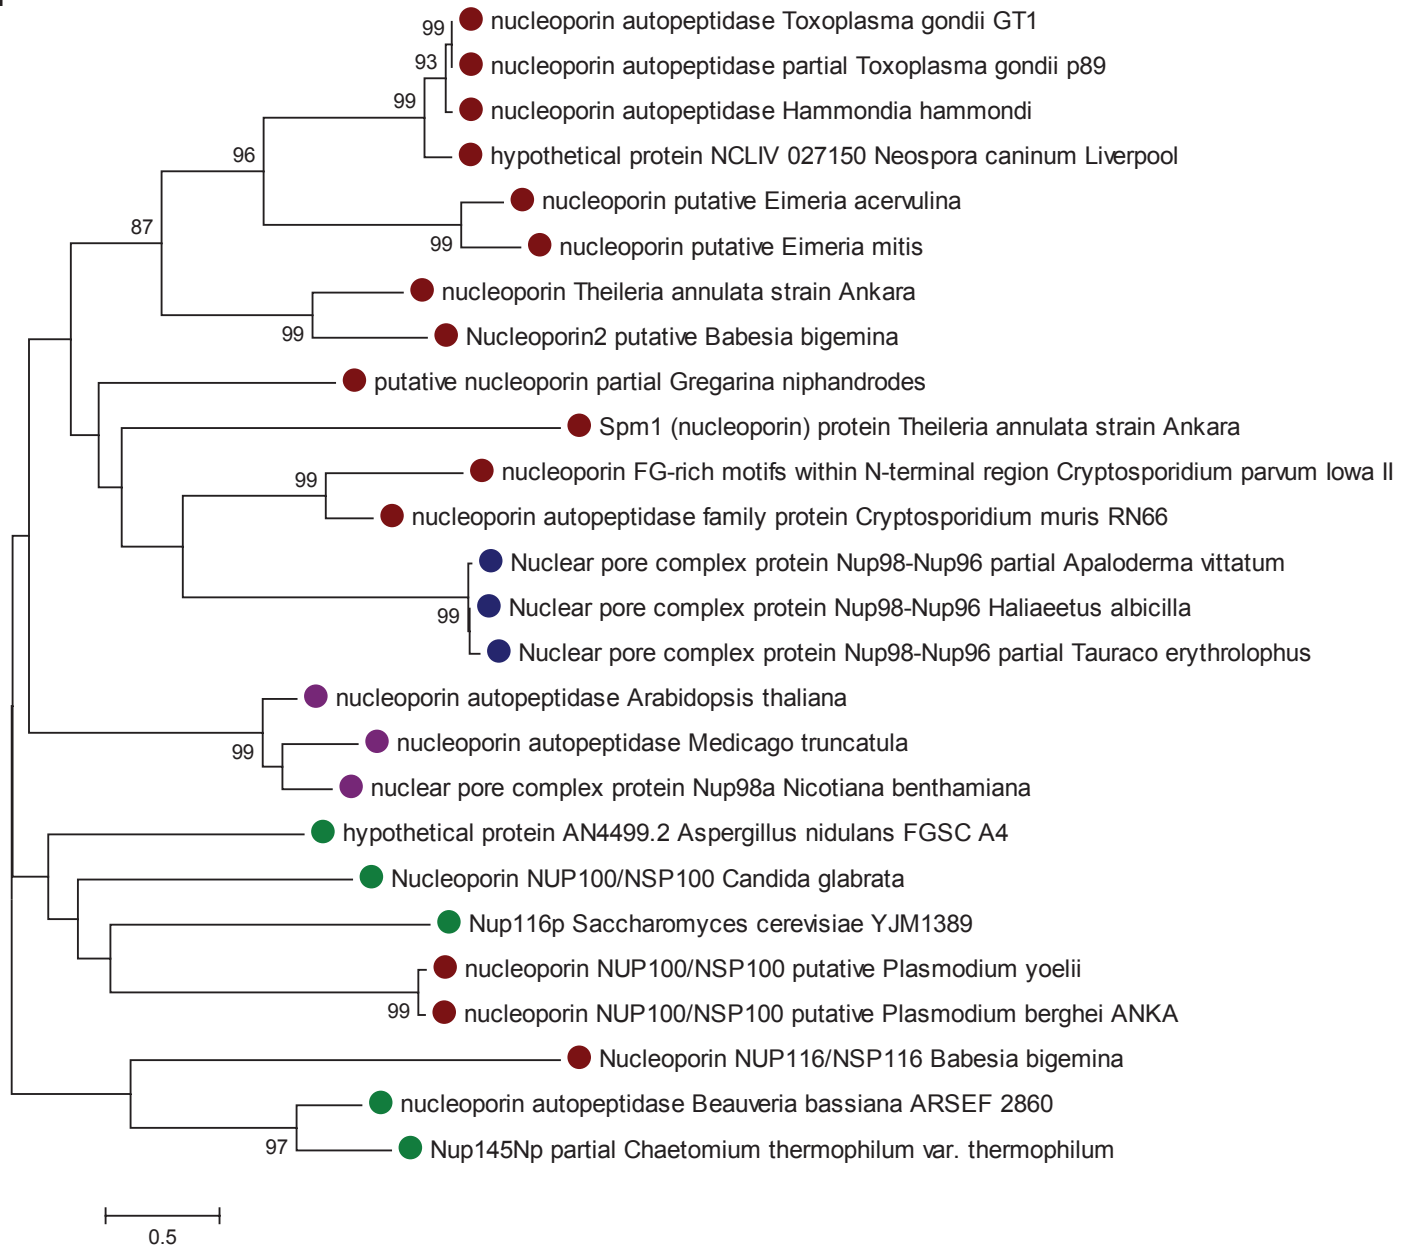

Supplement: 18_2017_2459_MOESM4_ESM.pdf [file 18_2017_2459_MOESM4_ESM.pdf]

Figure S2

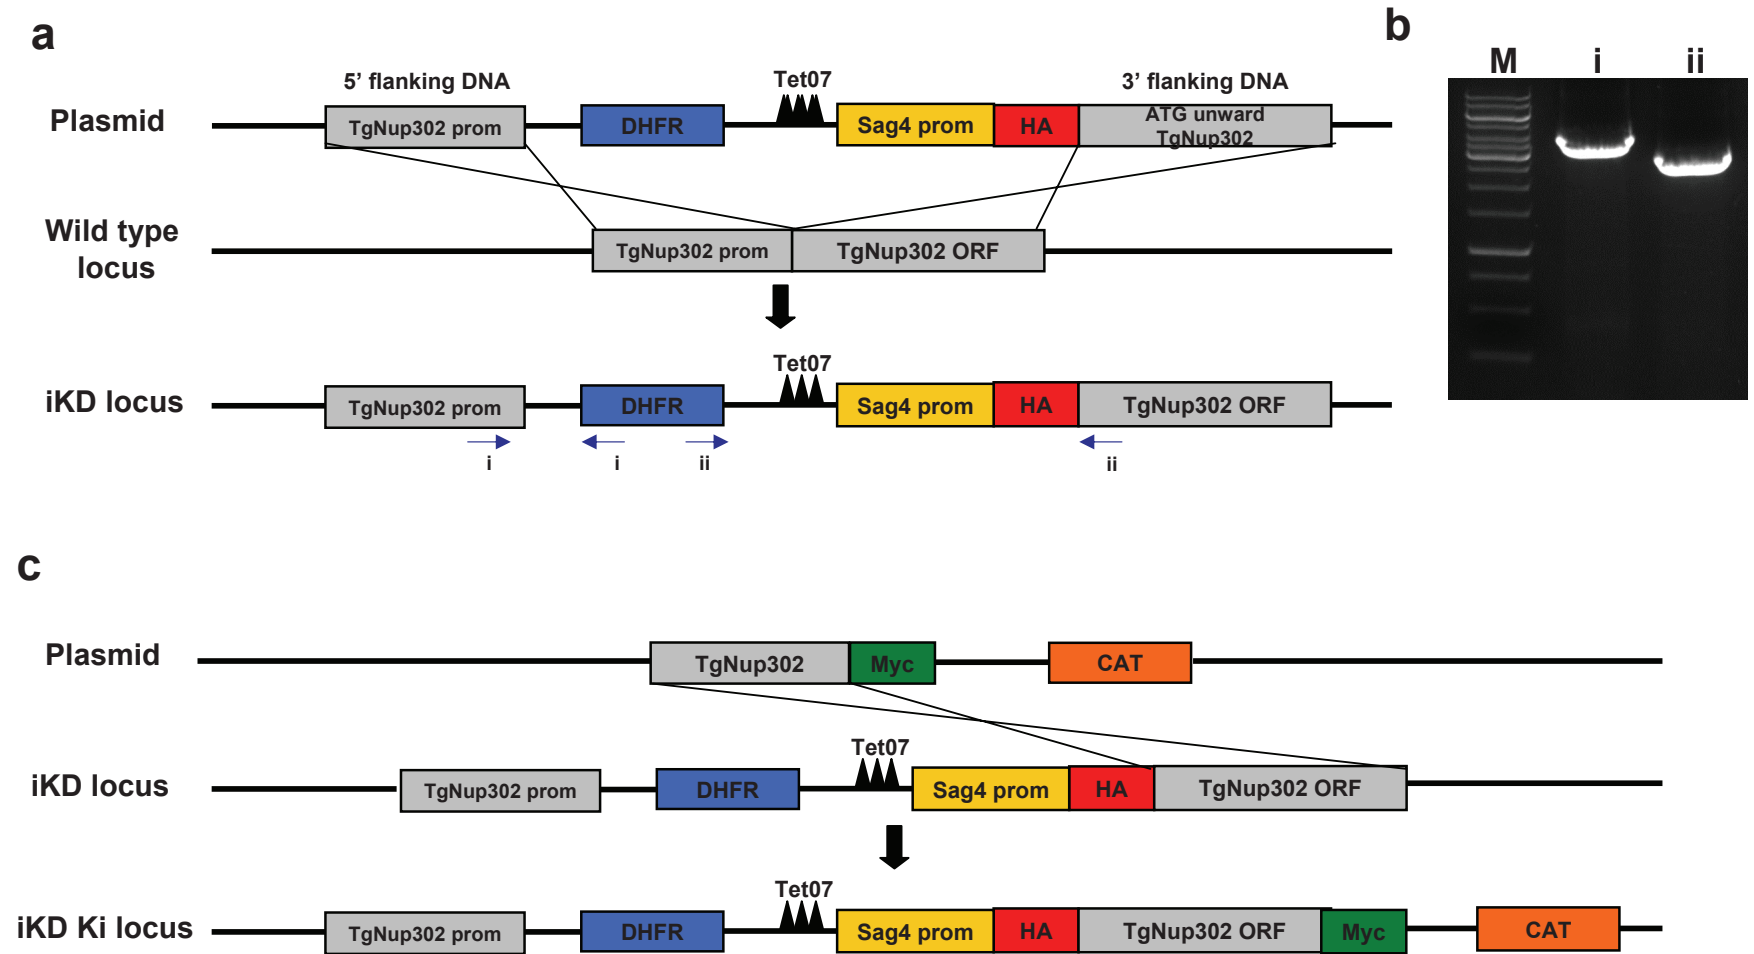

Supplement: 18_2017_2459_MOESM5_ESM.pdf [file 18_2017_2459_MOESM5_ESM.pdf]

Figure S3

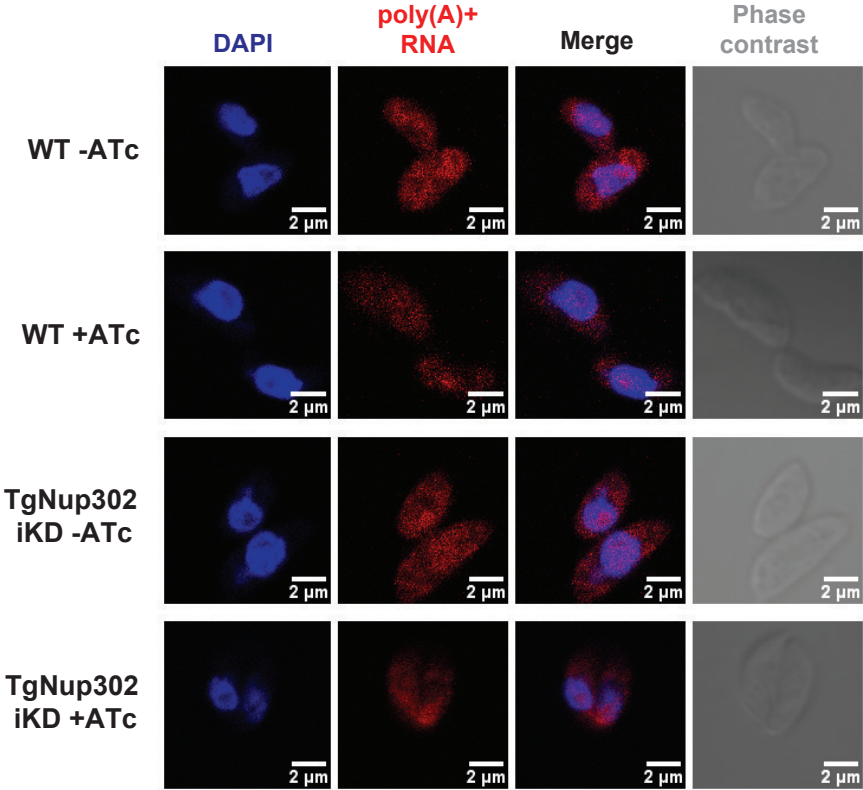

Supplement: 18_2017_2459_MOESM6_ESM.pdf [file 18_2017_2459_MOESM6_ESM.pdf]

Figure S4

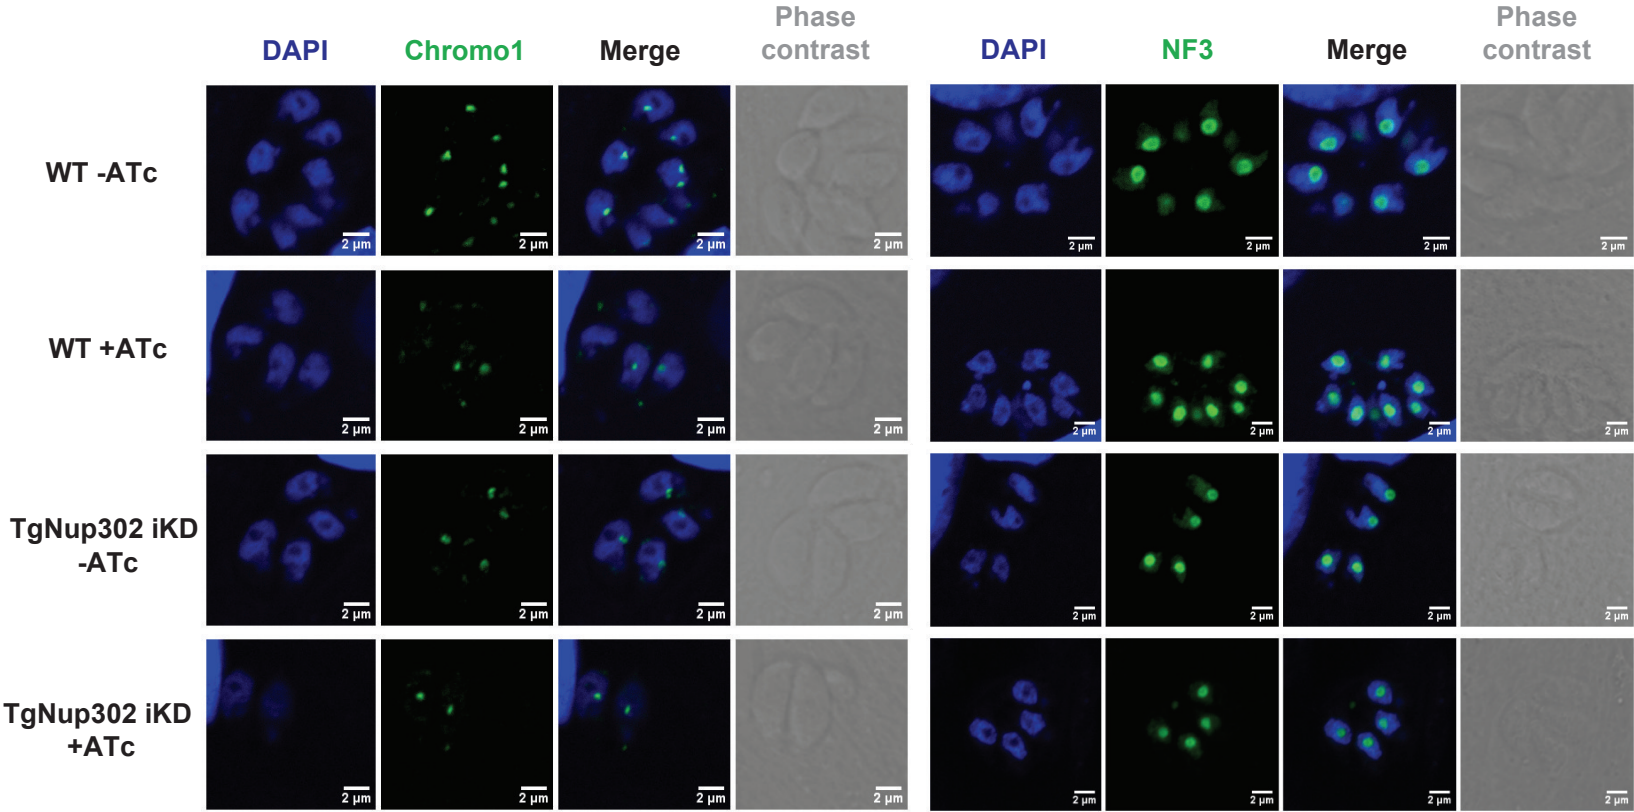

Supplement: 18_2017_2459_MOESM7_ESM.pdf [file 18_2017_2459_MOESM7_ESM.pdf]

Figure S5

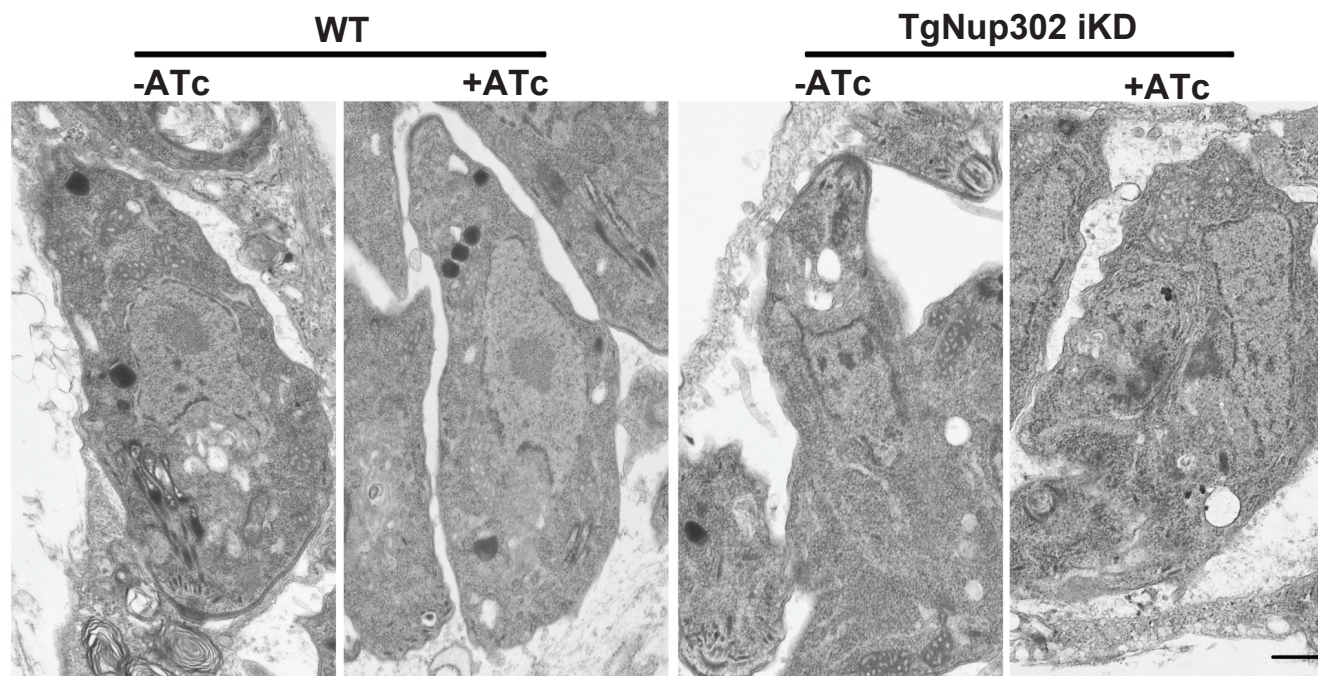

Supplement: 18_2017_2459_MOESM8_ESM.pdf [file 18_2017_2459_MOESM8_ESM.pdf]
